# Supplementary material
Source: Springer Nature journal article supplement (https://www.springermedizin.de/resource/supplementary/12890_2014_562_MOESM4_ESM.pdf/9505316)

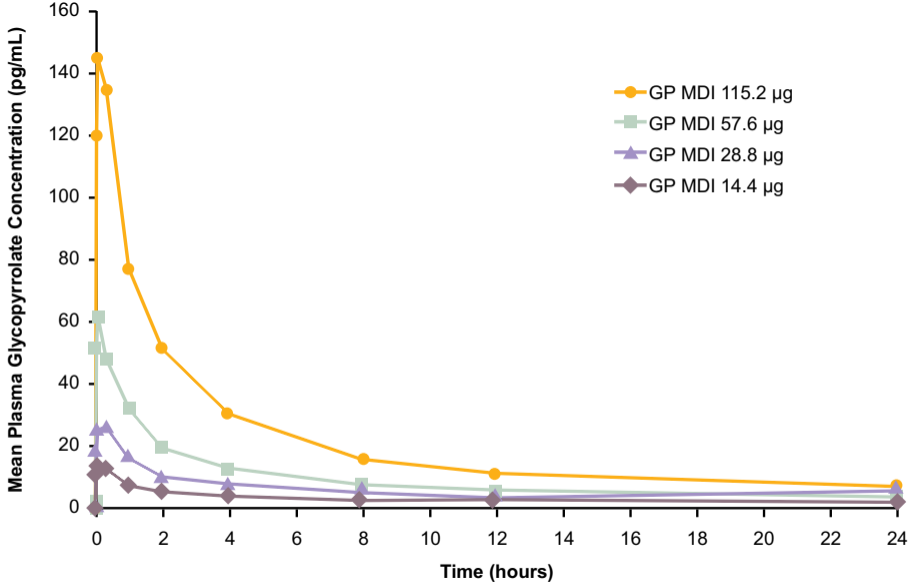

GP MDI=glycopyrronium metered-dose inhaler.

Supplement: MOESM4 [file 9505316]
